# Supplementary material for: Ionothermal synthesis, crystal structure and solid-state NMR spectroscopy of a new organically templated gallium oxalatophosphate: (H2TMPD)0.5[Ga3(C2O4)0.5(PO4)3] (TMPD = N,N,N′,N′-tetramethyl-1,3-propanediamine)
Source: Royal Society of Chemistry journal article supplement (doi:10.1039/b709673a), 2007-01-01
Supplement: b709673a.pdf [file b709673a.pdf]

## Supporting Information

### **Ionothermal Synthesis, Crystal Structure and Solid-State NMR Spectroscopy of a New Organically Templated Gallium Oxalatophosphate: $(\text{H}_2\text{TMPD})_{0.5}[\text{Ga}_3(\text{C}_2\text{O}_4)_{0.5}(\text{PO}_4)_3]$ (TMPD = N,N,N',N'-tetramethyl-1,3-propanediamine)**

**Ming-Feng Tang,<sup>a</sup> Yi-Hui Liu,<sup>a</sup> Pai-Ching Chang,<sup>a</sup> Yi-Chen Liao,<sup>a</sup> Hsien-Ming Kao,<sup>a</sup> and Kwang-Hwa Lii<sup>a,b,\*</sup>**

<sup>a</sup>Department of Chemistry, National Central University, Chungli; <sup>b</sup>Institute of Chemistry, Academia Sinica, Taipei, Taiwan, R.O.C.

**Figure S1.** Experimental X-ray powder pattern (top) and simulated powder pattern (bottom) based on the results from single-crystal X-ray diffraction for  $(\text{H}_2\text{TMPD})_{0.5}[\text{Ga}_3(\text{C}_2\text{O}_4)_{0.5}(\text{PO}_4)_3]$

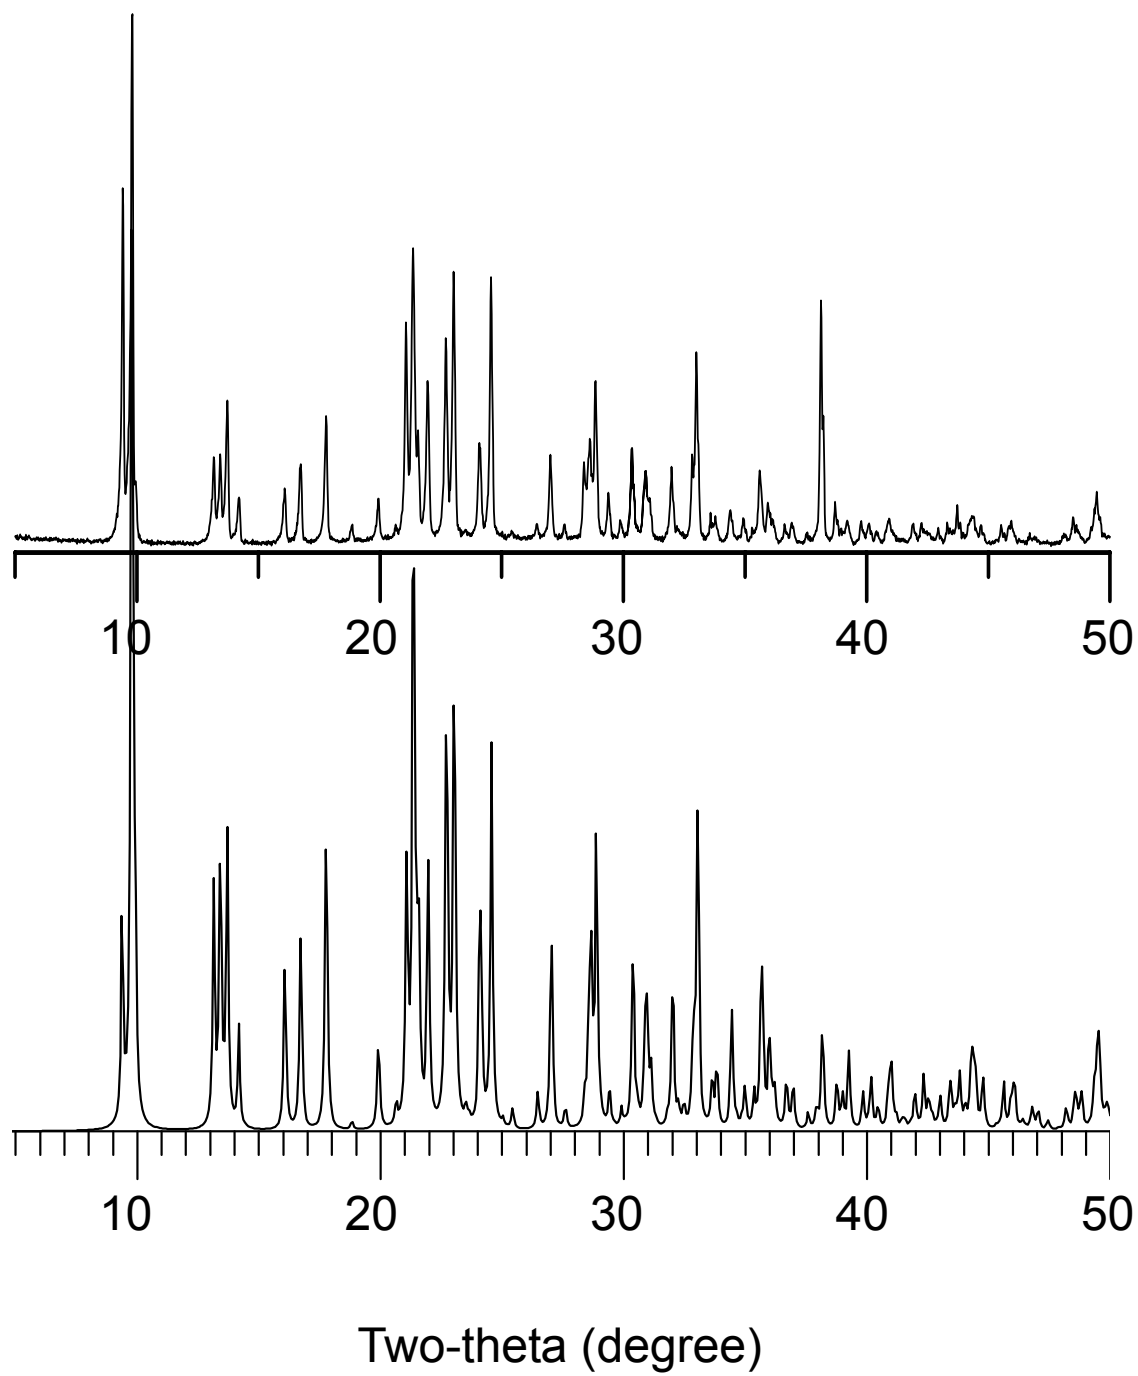

**Figure S1.**
